# Supplementary material
Source: PubMed Central journal article supplement (PMC3318670)
Supplement: supp_86.8.4488_TableS1.pdf [file supp_86.8.4488_TableS1.pdf]

Supplementary Table 1

| Subject ID <sup>~</sup> | HAART treatment | Viral load <50 | Time on HAART (Years) | Post-HAART CD4 recovery | Current CD4 T-lymphocyte count | HLA-B Type <sup>*</sup> |
|-------------------------|-----------------|----------------|-----------------------|-------------------------|--------------------------------|-------------------------|
| HIV01                   | Yes             | Yes            | 0.25                  | 72                      | 320                            | B15; <b>B57</b>         |
| HIV02                   | Yes             | Yes            | 1.92                  | 524                     | 872                            | <b>B44</b> ; <b>B51</b> |
| HIV03                   | Yes             | Yes            | 11                    | 351                     | 886                            | B18; <b>B44</b>         |
| HIV04                   | Yes             | Yes            | 10.25                 | 324                     | 469                            | <b>B44</b> ; <b>B53</b> |
| HIV05                   | Yes             | Yes            | 5.75                  | 168                     | 311                            | <b>B27</b> ; <b>B27</b> |
| HIV06                   | Yes             | Yes            | 13.50                 | 734                     | 941                            | B35; <b>B57</b>         |
| HIV07                   | No              | No             | n/a                   | n/a                     | 520                            | B40; <b>B51</b>         |
| HIV08                   | Yes             | Yes            | 14.08                 | 856                     | 1060                           | <b>B44</b> ;B62         |
| HIV09                   | No              | No             | n/a                   | n/a                     | 1033                           | <b>B27</b> ;B35         |
| HIV10                   | Yes             | Yes            | 5.92                  | 806                     | 990                            | <b>B44</b> ; <b>B44</b> |
| HIV11                   | No              | No             | n/a                   | n/a                     | 404                            | B07; <b>B49</b>         |
| HIV12                   | Yes             | Yes            | 0.75                  | 133                     | 588                            | B07;B18                 |
| HIV13                   | No              | No             | n/a                   | n/a                     | 454                            | B08;B08                 |
| HIV14                   | Yes             | Yes            | 9.25                  | 458                     | 634                            | B08;B40                 |
| HIV15                   | Yes             | Yes            | 13.33                 | 63                      | 225                            | B07;B08                 |
| HIV16                   | Yes             | Yes            | 14.50                 | 647                     | 857                            | B07;B14                 |
| HIV17                   | Yes             | Yes            | 7.5                   | 418                     | 599                            | B14;B40                 |
| HIV18                   | Yes             | Yes            | 6.42                  | 490                     | 634                            | B07;B40                 |
| HIV19                   | Yes             | Yes            | 9.75                  | 0                       | 799                            | B07;B40                 |
| HIV20                   | Yes             | Yes            | 3.42                  | 277                     | 393                            | B18;B35                 |
| HIV21                   | Yes             | Yes            | 2.83                  | 473                     | 360                            | B08; <b>B44</b>         |
| HIV22                   | Yes             | Yes            | 0.67                  | 108                     | 355                            | B39; <b>B44</b>         |
| HIV23                   | Yes             | Yes            | 7                     | 497                     | 426                            | B15; <b>B51</b>         |
| HIV24                   | Yes             | Yes            | 1.17                  | 69                      | 403                            | B08; <b>B57</b>         |
| HIV25                   | Yes             | Yes            | 1.75                  | 155                     | 528                            | <b>B51</b> ;B54         |
| HIV26                   | Yes             | Yes            | 1.08                  | 183                     | 716                            | <b>B44</b> ; <b>B51</b> |
| HIV27                   | Yes             | Yes            | 7.92                  | 64                      | 395                            | <b>B44</b> ; <b>B44</b> |
| HC01                    | n/a             | n/a            | n/a                   | n/a                     | n/a                            | <b>B44</b> ; <b>B51</b> |
| HC02                    | n/a             | n/a            | n/a                   | n/a                     | n/a                            | <b>B44</b> ; <b>B44</b> |

|      |     |     |     |     |     |                         |
|------|-----|-----|-----|-----|-----|-------------------------|
| HC03 | n/a | n/a | n/a | n/a | n/a | B07; <b>B44</b>         |
| HC04 | n/a | n/a | n/a | n/a | n/a | <b>B44</b> ; <b>B57</b> |
| HC05 | n/a | n/a | n/a | n/a | n/a | <b>B13</b> ; <b>B35</b> |
| HC06 | n/a | n/a | n/a | n/a | n/a | B07; <b>B44</b>         |
| HC07 | n/a | n/a | n/a | n/a | n/a | B40; <b>B44</b>         |
| HC08 | n/a | n/a | n/a | n/a | n/a | B40; <b>B51</b>         |
| HC09 | n/a | n/a | n/a | n/a | n/a | B18; <b>B38</b>         |
| HC10 | n/a | n/a | n/a | n/a | n/a | B60; <b>B51</b>         |
| HC11 | n/a | n/a | n/a | n/a | n/a | B07; <b>B44</b>         |
| HC12 | n/a | n/a | n/a | n/a | n/a | B08,B15                 |
| HC13 | n/a | n/a | n/a | n/a | n/a | B35; <b>B35</b>         |
| HC14 | n/a | n/a | n/a | n/a | n/a | B07; <b>B41</b>         |
| HC15 | n/a | n/a | n/a | n/a | n/a | B39; <b>B40</b>         |
| HC16 | n/a | n/a | n/a | n/a | n/a | B07; <b>B18</b>         |
| HC17 | n/a | n/a | n/a | n/a | n/a | B35; <b>B55</b>         |

---

~HIV-infected subjects are coded are HIV00 and healthy control subjects are coded as HC00.

\*HLA-Bw4 carrying alleles are bolded.
